# Supplementary material for: Seasonal variation in SARS-CoV-2 transmission in temperate climates: A Bayesian modelling study in 143 European regions
Source: PubMed Central journal article supplement (PMC9455844; doi:10.1371/journal.pcbi.1010435), 2022-08-26

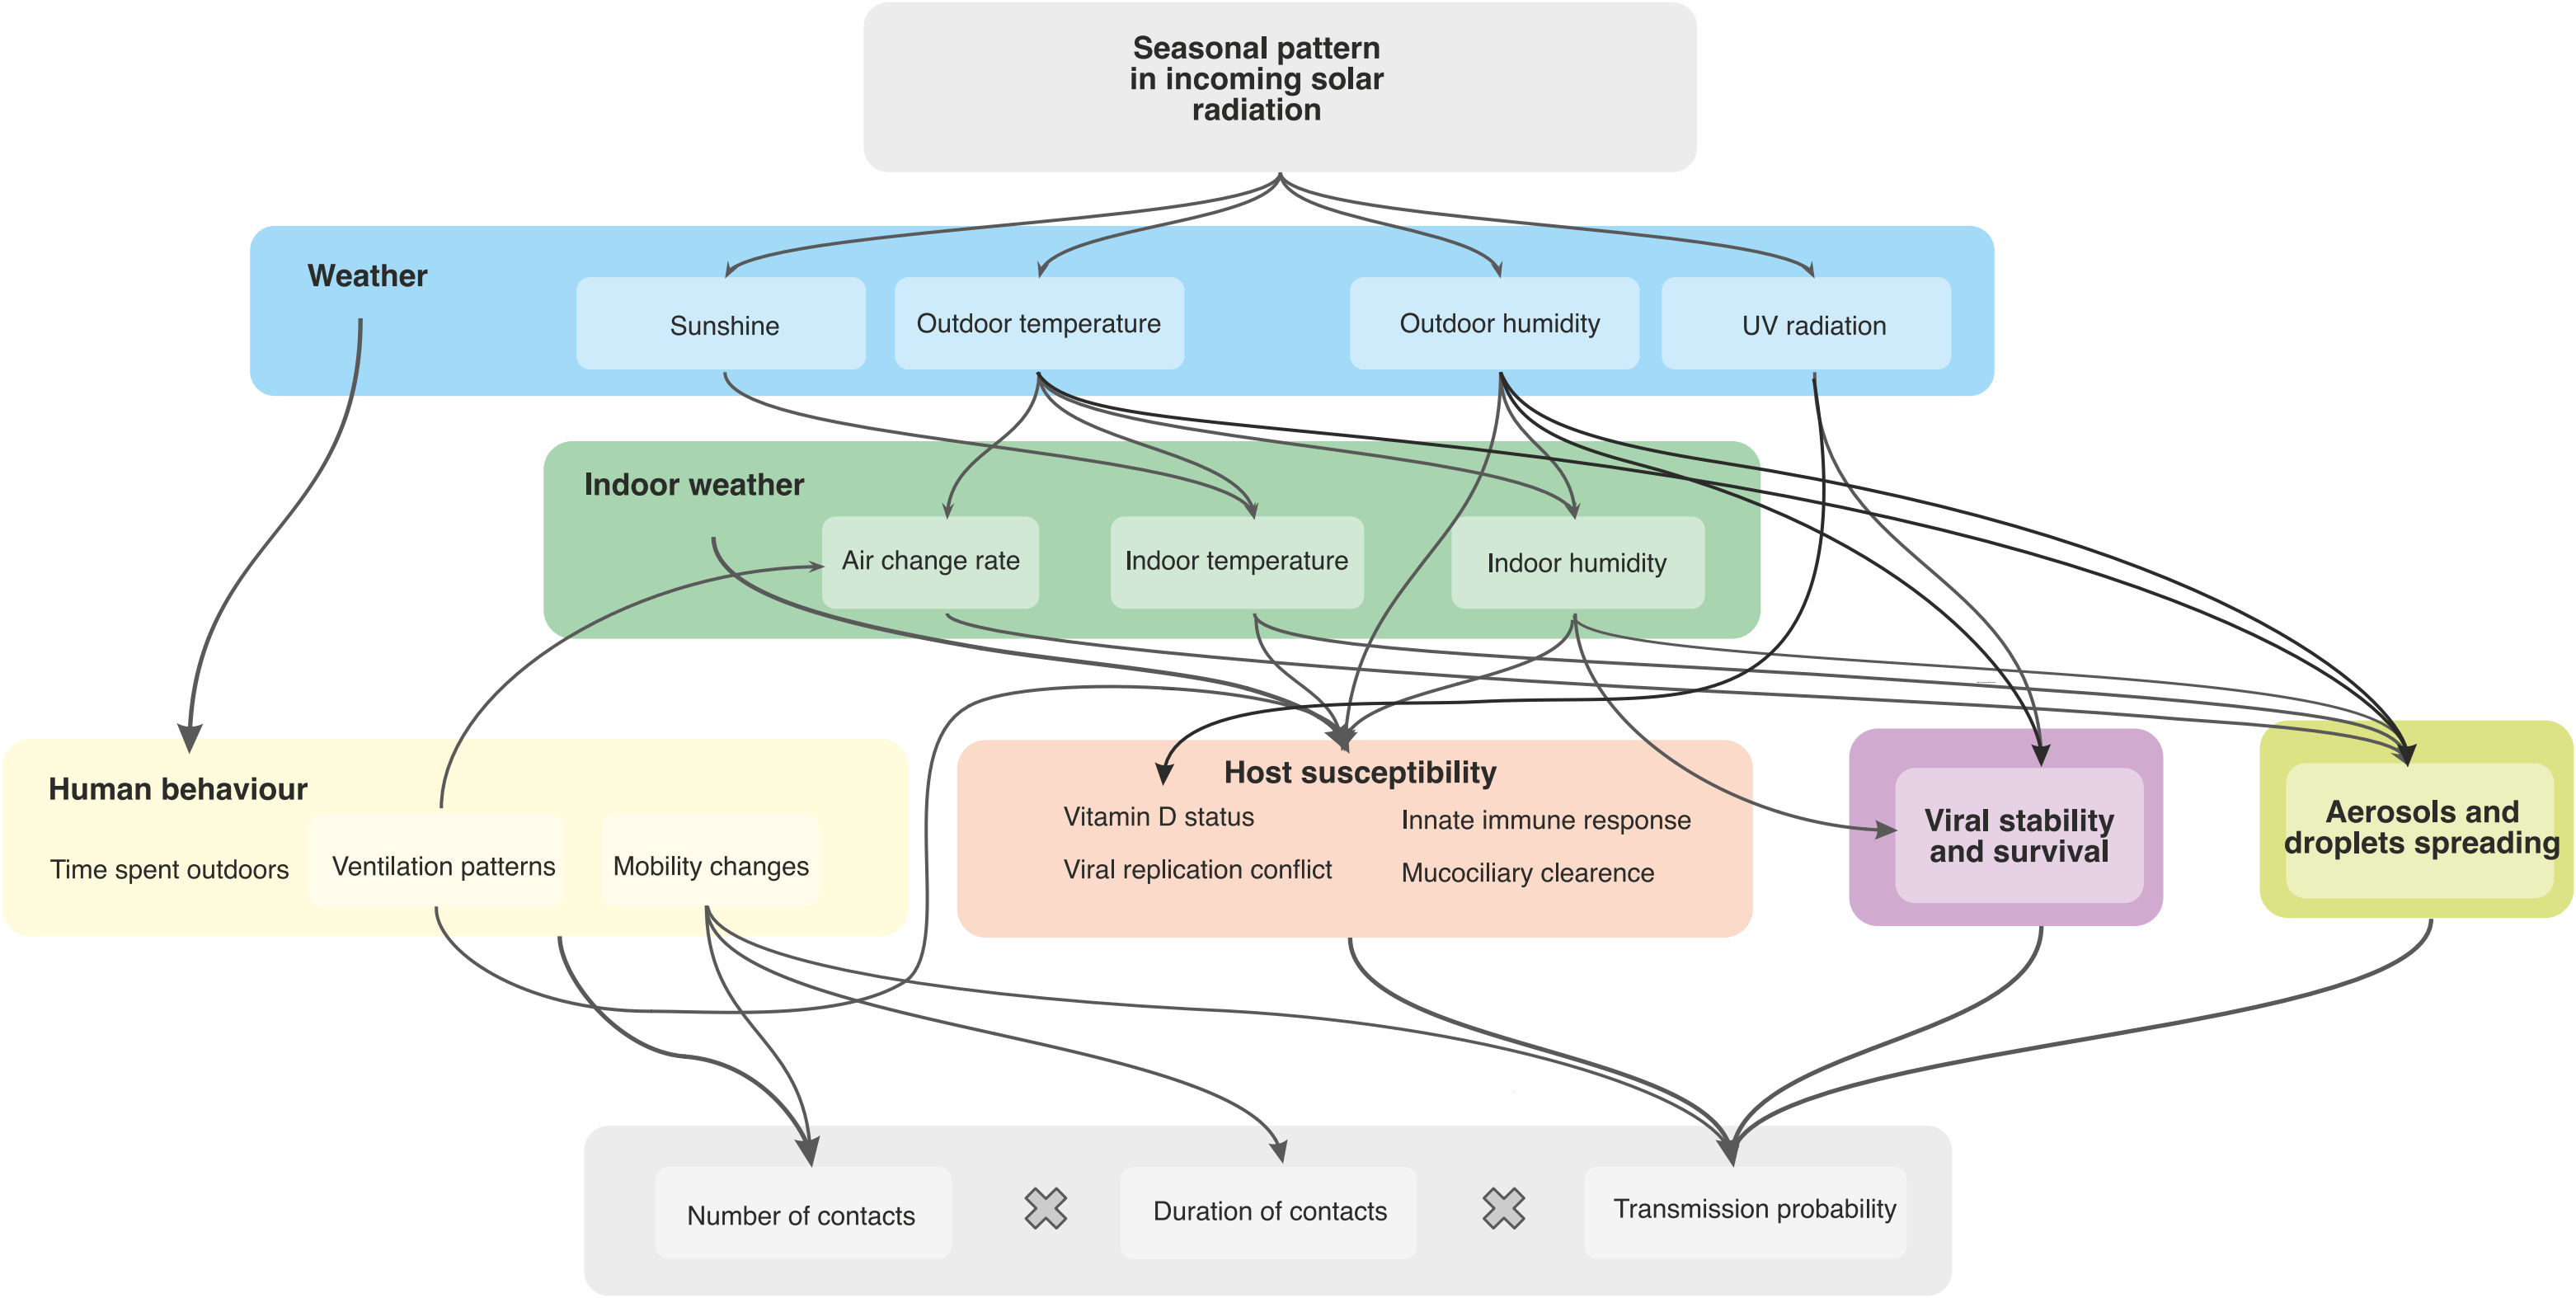

Supplement: pcbi.1010435.s001.pdf [file pcbi.1010435.s001.pdf]
