# Supplementary material for: Seasonal variation in SARS-CoV-2 transmission in temperate climates: A Bayesian modelling study in 143 European regions
Source: PubMed Central journal article supplement (PMC9455844; doi:10.1371/journal.pcbi.1010435), 2022-08-26
Supplement: pcbi.1010435.s004.pdf [file pcbi.1010435.s004.pdf]

# 1 Detailed results

| Model                          | Seasonal amplitude $\gamma$ |               |               |
|--------------------------------|-----------------------------|---------------|---------------|
|                                | Median                      | 50% CI        | 95% CI        |
| Seasonal Sharma <i>et al.</i>  | 0.275                       | 0.248 – 0.300 | 0.200 – 0.348 |
| Seasonal Brauner <i>et al.</i> | 0.254                       | 0.209 – 0.297 | 0.118 – 0.383 |
| Combined                       | 0.267                       | 0.231 – 0.299 | 0.141 – 0.365 |

  

| Model                          | Peak-to-trough $R$ reduction [%] |             |             |
|--------------------------------|----------------------------------|-------------|-------------|
|                                | Median                           | 50% CI      | 95% CI      |
| Seasonal Sharma <i>et al.</i>  | 43.1                             | 39.7 – 46.2 | 33.3 – 51.6 |
| Seasonal Brauner <i>et al.</i> | 40.5                             | 34.6 – 45.8 | 21.1 – 55.4 |
| Combined                       | 42.1                             | 37.5 – 46.1 | 24.7 – 53.4 |

**Table 1.** Inferred median values and credible intervals of the seasonal amplitude  $\gamma$  and the peak-to-trough seasonality  $R$  reduction for temperate Europe countries.

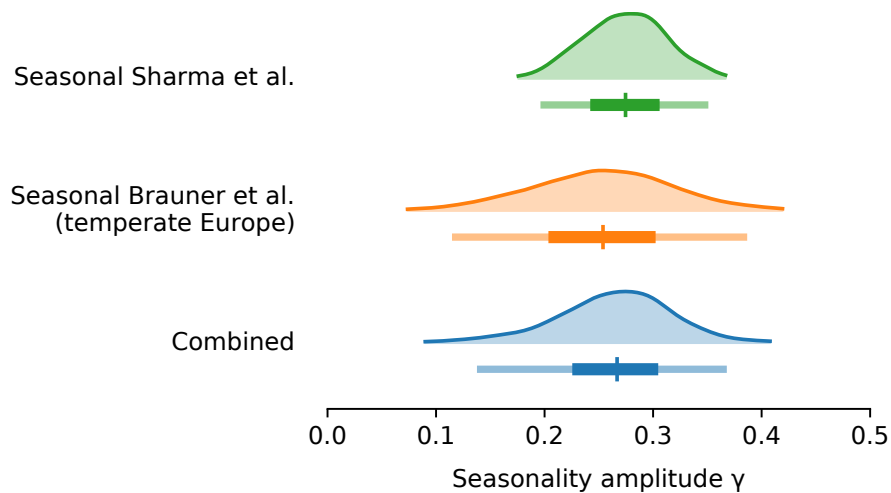

**Fig 1.** Posterior distributions the seasonal amplitude factor  $\gamma$  with 50% and 95% credible intervals.
